# Supplementary material for: Rapid reviews methods series: Guidance on literature search
Source: HighWire-hosted journal article supplement (doi:10.1136/bmjebm-2022-112079), 2023-04-19
Supplement: bmjebm-2022-112079supp001_data_supplement.pdf [file bmjebm-2022-112079supp001_data_supplement.pdf]

## Appendix A: Glossary

This glossary contains definitions of important terms used in this article.

| Term                                                                    | Definition                                                                                                                                                                                                                                                                                                                                                                                                                                                                                                                                                                                                                                                                                                                                                                                                                                                                                                              |
|-------------------------------------------------------------------------|-------------------------------------------------------------------------------------------------------------------------------------------------------------------------------------------------------------------------------------------------------------------------------------------------------------------------------------------------------------------------------------------------------------------------------------------------------------------------------------------------------------------------------------------------------------------------------------------------------------------------------------------------------------------------------------------------------------------------------------------------------------------------------------------------------------------------------------------------------------------------------------------------------------------------|
| Database coverage                                                       | The proportion of eligible records available in a database. A database has high coverage of a topic if a large percentage of topic-relevant records found by any means are available in this database. For example, an SR may have searched ten different information sources, but a retrospective analysis could find all included studies are indexed in MEDLINE. This indicates that MEDLINE has high coverage of this topic.                                                                                                                                                                                                                                                                                                                                                                                                                                                                                        |
| Eligibility criteria<br>(Also: inclusion & exclusion criteria, PICOS)   | Criteria defining the parameters for the inclusion and exclusion of studies in a review. They are based on the research question and defined during the protocol phase. Preliminary searches and known relevant records usually help define the finalised eligibility criteria. The full systematic search (database and supplementary searching) can only be conducted based on the finalised eligibility criteria.                                                                                                                                                                                                                                                                                                                                                                                                                                                                                                    |
| Grey literature                                                         | Non-published evidence, or evidence released outside of traditional commercial or academic publishing, in contrast to evidence released through traditional publishing (i.e., in a journal article or a book). This can include various digital (and printed) documents, such as study register entries, preprints (but <u>not</u> in-press versions of journal articles), reports of government and non-government organizations, dissertations and theses, conference abstracts and proceedings, etc.                                                                                                                                                                                                                                                                                                                                                                                                                 |
| Information specialist                                                  | In the context of evidence synthesis development, information specialist are professional searchers who have expertise in the methodology of systematic searching. Information specialists often have a background in Library and Information Science. (see also Appendix C, 1.1)                                                                                                                                                                                                                                                                                                                                                                                                                                                                                                                                                                                                                                       |
| Known relevant records (Also: key studies, test set, benchmark records) | Literature relevant to the research question that is already known before the systematic search strategy is finalised and searches are run. These texts are usually found through preliminary searching. Ideally, they should meet the eligibility criteria at least at abstract screening level. Known relevant studies can be used to identify search terms, choose relevant information sources, and validate search strategies. (See Appendix C, section 1.3.)                                                                                                                                                                                                                                                                                                                                                                                                                                                      |
| Limiting function<br>(Also: limits, filters)                            | Features built into a database or interface that allow search results to be narrowed by specific criteria (e.g., publication date ranges, language, gender, age group, publication type). Some filtering functions are based on validated search filters (see below), but not all. To avoid unintentionally removing eligible studies from the search result, the searcher must understand the underlying mechanism of the limiting functions they intend to use.                                                                                                                                                                                                                                                                                                                                                                                                                                                       |
| Precision                                                               | <p>A metric to assess the effectiveness of a literature search. The proportion of eligible/relevant documents in a search result:</p> $\left( \frac{\text{Relevant documents identified}}{\text{Total search result}} \right) \times 100$ <p>Precision and sensitivity are inversely related. A highly precise search will not be very sensitive. In comprehensive systematic searches, sensitivity is valued over precision. A focused systematic search aims to increase the precision of a search without sacrificing too much sensitivity.</p> <p>(In the context of systematic searching "relevant documents" are determined by a systematic literature selection process. They are identical with the references to studies that meet the inclusion criteria of the review and are included in the final review. Precision might be calculated for a single search source or across all information sources.)</p> |

|                                                                                                 |                                                                                                                                                                                                                                                                                                                                                                                                                                                                                                                                                                                                                                                                                                                                                                                                                                                                                                                                                                                                                                                                                                                                                                                   |
|-------------------------------------------------------------------------------------------------|-----------------------------------------------------------------------------------------------------------------------------------------------------------------------------------------------------------------------------------------------------------------------------------------------------------------------------------------------------------------------------------------------------------------------------------------------------------------------------------------------------------------------------------------------------------------------------------------------------------------------------------------------------------------------------------------------------------------------------------------------------------------------------------------------------------------------------------------------------------------------------------------------------------------------------------------------------------------------------------------------------------------------------------------------------------------------------------------------------------------------------------------------------------------------------------|
|                                                                                                 |                                                                                                                                                                                                                                                                                                                                                                                                                                                                                                                                                                                                                                                                                                                                                                                                                                                                                                                                                                                                                                                                                                                                                                                   |
| Preliminary searches<br>(Also: scoping searches, exploratory searches)                          | Any searches conducted during the protocol phase to inform the further review process. Unlike the systematic search proper, these searches are not usually documented or reported in the final review report.<br>(See Appendix C, section 1.2.)                                                                                                                                                                                                                                                                                                                                                                                                                                                                                                                                                                                                                                                                                                                                                                                                                                                                                                                                   |
| Search filters<br>(Also: hedges)                                                                | Predefined database- and interface-specific search queries that can be used in a larger search strategy to identify references meeting certain criteria (e.g., study design, age group). Filters usually combine free-text terms (e.g., searching in title abstract) and subject headings (e.g., MeSH terms). Validated search filters have been assessed for sensitivity, specificity, and precision based on a gold standard set of eligible references.                                                                                                                                                                                                                                                                                                                                                                                                                                                                                                                                                                                                                                                                                                                        |
| Search strategy                                                                                 | The interface-specific Boolean search query run in a particular database (e.g., MEDLINE) using a particular interface (e.g., Ovid). When several databases are searched, this query is usually developed in a primary database (e.g., Ovid MEDLINE) and translated to other databases/interfaces. Different databases and interfaces offer different search options and search queries need to be adapted accordingly.                                                                                                                                                                                                                                                                                                                                                                                                                                                                                                                                                                                                                                                                                                                                                            |
| Search syntax                                                                                   | Syntax refers to the correct expression of a search query in a specific interface. It includes the fields that can be searched (e.g., title, abstract), the available operators (e.g., Boolean, proximity), and other functionalities such as truncation, wild cards, and types of phrase searching.<br>Syntax is interface AND database-specific. For example, the same MEDLINE search query will look different if expressed for Ovid MEDLINE or PubMed. On the other hand, two search strategies searching MEDLINE and Embase via the Ovid interface will look broadly similar, except for database specific subject headings and data fields.                                                                                                                                                                                                                                                                                                                                                                                                                                                                                                                                 |
| Sensitivity<br>(Also: recall)                                                                   | A metric to assess the effectiveness of a literature search. The proportion of relevant documents found with a specific search strategy (e.g., Ovid MEDLINE) divided by the total number of relevant documents included in the review.<br>$\left( \frac{\text{Relevant documents identified}}{\text{Total number of relevant documents (in the source)}} \right) \times 100$<br>Precision and Sensitivity are inversely related. A highly precise search will not be very sensitive. In comprehensive systematic searches, sensitivity is valued over precision. A focused, systematic search aims to increase the precision of a search without sacrificing too much sensitivity. To validate a search strategy means assessing sensitivity of a database search based on the retrieval of benchmark records.<br>(In the context of systematic searching "relevant documents" are determined by a systematic literature selection process. They are identical with the references to studies that meet the inclusion criteria of the review and are included in the final review. Sensitivity might be calculated for a single search source or across all information sources.) |
| Study selection (Also: literature screening, study selection, abstract and full-text screening) | Search results are assessed for their suitability for inclusion in the review based on the predefined eligibility criteria. (A separate paper in this series will focus on considerations for literature screening in RRs.)                                                                                                                                                                                                                                                                                                                                                                                                                                                                                                                                                                                                                                                                                                                                                                                                                                                                                                                                                       |
| Systematic search                                                                               | Information retrieval processes aimed to systematically identify eligible studies for a review. The systematic search combines several information sources, and usually includes database search strategies and supplementary search techniques. The systematic search process must be as transparent and reproducible as possible and                                                                                                                                                                                                                                                                                                                                                                                                                                                                                                                                                                                                                                                                                                                                                                                                                                            |

|  |                                         |
|--|-----------------------------------------|
|  | be reported in the final review report. |
|--|-----------------------------------------|

# Appendix B: Useful resources

## Guidance for systematic searching

Bramer, W. M., et al. (2018). A systematic approach to searching: an efficient and complete method to develop literature searches. *J Med Libr Assoc*, 106(4), 531-541. doi: <https://doi.org/10.5195/jmla.2018.283>

Cooper, C., et al. (2022). A Tailored Approach: A model for literature searching in complex systematic reviews. *Journal of Information Science*. doi: <https://doi.org/10.1177/01655515221114452>

European network for Health Technology Assessment (EUnetHTA). (2020). Process of information retrieval for systematic reviews and health technology assessments on clinical effectiveness. Version 2.0. Retrieved from [https://eunetha.eu/wp-content/uploads/2020/01/EUnetHTA\\_Guideline\\_Information\\_Retrieval\\_v2-0.pdf](https://eunetha.eu/wp-content/uploads/2020/01/EUnetHTA_Guideline_Information_Retrieval_v2-0.pdf)

Lefebvre C, et al. (2022). Chapter 4: Searching for and selecting studies. In: Higgins JPT, et al. (editors). *Cochrane Handbook for Systematic Reviews of Interventions* version 6.3 (updated February 2022). Cochrane, 2022. Retrieved from <https://training.cochrane.org/handbook/current/chapter-04>

## Templates for planning & documenting searches

Planning a search (in collaboration with an expert searcher): Wafford, Q. E., & O'Dwyer, L. C. (2021). Adopting a toolkit to manage time, resources, and expectations in the systematic review process: a case report. *Journal of the Medical Library Association*, 109(4), <https://www.ncbi.nlm.nih.gov/pmc/articles/PMC8608198/>.

Documentation and peer review process or database searches: Cochrane Effective Practice and Organisation of Care (EPOC). (2021). "Search audit template excel spreadsheet." <https://zenodo.org/record/5106380>.

Reviewing the comparative yield of search methods in a review: Bethel, A. C., M. Rogers and R. Abbott (2021). "Use of a search summary table to improve systematic review search methods, results, and efficiency." *J Med Libr Assoc* **109**(1): 97-106, <http://jmla.pitt.edu/ojs/jmla/article/view/809/1238>.

Reporting search methods in protocols, reviews, or updates: Cochrane. "Cochrane Information Specialists Portal: Searching: Recording & Reporting." <https://community.cochrane.org/organizational-info/resources/resources-groups/information-specialists-portal/searching-recording-reporting> .

Data management plan: Heather Ganshorn, Zahra Premji, & Paul E. Ronksley. (2021). Data Management Plan Template: Systematic Reviews. <https://zenodo.org/record/4663434>

## Tools

IEBH Systematic Review Accelerator: <https://sr-accelerator.com/#/>

- Includes tools for text analysis, search strategy translation, deduplication of search results, and citation searching

PubMed PubReMiner: <https://hgserver2.amc.nl/cgi-bin/miner/miner2.cgi>

- Simple word frequency analysis of MEDLINE records

Citation Chaser: <https://estech.shinyapps.io/citationchaser/>

- Pulls backwards and forwards citations for a set of seed papers

Citation Finder: <https://citation-finder.vercel.app/>

- Can be used to create RIS or BibTex files from a reference list

Risklick Deduklick: <https://www.risklick.ch/products/deduklick/>

- A web-application for automated deduplication of search results

## Websites

Summarized Research in Information Retrieval for HTA (SuRe Info):

<https://sites.google.com/york.ac.uk/sureinfo/home>

- web resource that provides research-based information relating to the information retrieval aspects of producing systematic reviews and health technology assessments

MIAR: <https://miar.ub.edu/>

- Identifies which databases index a specific journal

The ISSG Search Filter Resource: <https://sites.google.com/a/york.ac.uk/issg-search-filters-resource/home>

- collection of -mainly published and validated- search filters/hedges for various study designs and topics

University Library Vrije Universiteit Amsterdam - Search blocks: <https://blocks.bmi-online.nl/>

- collection of non-validated search strings for wide variety of topics

searchRxiv: <https://searchrxiv.org/>

- Repository for search strategies

Ovid Tools & Resources Portal: Expert Searches:

<https://tools.ovid.com/ovidtools/expertsearches.html>

- Various search filters for MEDLINE and Embase via the Ovid interface

## Resources for grey literature searching

Canadian Agency for Drugs and Technologies in Health. (June 10, 2022). "Grey Matters: a practical tool for searching health-related grey literature." from <https://www.cadth.ca/grey-matters-practical-tool-searching-health-related-grey-literature?msclkid=3ca8070fc56211ecb566d3e97fdbcad6>

Glanville, J. and C. Lefebvre. (18 May 2022). "Finding clinical trials, research registers and research results." from <https://sites.google.com/a/york.ac.uk/yhectrialsregisters/home>

Langham-Putrow, A. and A. Riegelman (2019). "Discovery and scholarly communication aspects of preprints: Sources for online information." 2019 80(9). Retrieved from <https://crln.acrl.org/index.php/crlnews/article/view/23580/30897>

University of Toronto Libraries. (2021, May 16, 2022). "Develop your Grey Literature Search Strategy." Searching the Literature: A Guide to Comprehensive Searching in the Health Sciences, from <https://guides.library.utoronto.ca/c.php?g=577919&p=4123572>

## Text analysis and text mining for search strategy design

Adam, G. P., & Paynter, R. (2022). Development of literature search strategies for evidence syntheses: pros and cons of incorporating text mining tools and objective approaches. *BMJ Evid Based Med*. doi: <https://doi.org/10.1136/bmjebm-2021-111892>

Glanville, J., & Wood, H. (2018). *Text Mining Opportunities: White Paper*. In CADTH (Ed.). [https://www.cadth.ca/sites/default/files/pdf/methods/2018-05/MG0013\\_CADTH\\_Text-Mining\\_Opportunitites\\_Final.pdf](https://www.cadth.ca/sites/default/files/pdf/methods/2018-05/MG0013_CADTH_Text-Mining_Opportunitites_Final.pdf)

Grames, E. M., Stillman, A. N., Tingley, M. W., Elphick, C. S., & Freckleton, R. (2019). An automated approach to identifying search terms for systematic reviews using keyword co-occurrence networks. *Methods in Ecology and Evolution*, 10(10), 1645-1654. doi: <https://doi.org/10.1111/2041-210x.13268>

Hausner, E., Waffenschmidt, S., Kaiser, T., & Simon, M. (2012). *Routine development of objectively derived search strategies*. *Syst Rev*, 1, 19. doi: <https://doi.org/10.1186/2046-4053-1-19>

McGowan, B. S. (2021). Using Text Mining Tools to Inform Search Term Generation: An Introduction for Librarians. *portal: Libraries and the Academy*, 21(3), 603-618. doi: <https://doi.org/10.1353/pla.2021.0032>

O'Keefe, H., Rankin, J., Wallace, S. A., & Beyer, F. (2022). Investigation of text-mining methodologies to aid the construction of search strategies in systematic reviews of diagnostic test accuracy—a case study. *Res Synth Methods*, doi: <https://doi.org/10.1002/jrsm.1593>

# Appendix C: Elaboration and practical considerations

## Content

|       |                                                                               |    |
|-------|-------------------------------------------------------------------------------|----|
| 1     | Preparation and planning                                                      | 8  |
| 1.1   | Involvement of information specialists                                        | 8  |
| 1.2   | Preliminary searches                                                          | 8  |
| 1.3   | Known relevant records                                                        | 9  |
| 2     | Information sources and search methods                                        | 10 |
| 2.1   | General considerations for selection of RR information sources                | 10 |
| 2.2   | Example: Reviews based on randomised controlled trials (RCTs)                 | 11 |
| 2.2.1 | What is known                                                                 | 11 |
| 2.2.2 | Possible streamlined search approaches                                        | 12 |
| 2.3   | Example: COVID-19 reviews                                                     | 12 |
| 2.3.1 | What is known                                                                 | 12 |
| 2.3.2 | Considerations for streamlined search approaches                              | 13 |
| 2.4   | Testing the coverage of the intended primary database                         | 13 |
| 3     | Search strategies                                                             | 13 |
| 3.1   | Text analysis                                                                 | 14 |
| 3.2   | Improving search precision and sensitivity                                    | 14 |
| 3.2.1 | Database/Interface-specific search functionalities                            | 16 |
| 3.3   | Translating search strategies                                                 | 16 |
| 3.4   | Removing specific document types from database search results                 | 17 |
| 3.4.1 | Ovid MEDLINE                                                                  | 17 |
| 3.4.2 | Ovid Embase                                                                   | 17 |
| 3.4.3 | Embase.com                                                                    | 17 |
| 3.4.4 | Scopus.com                                                                    | 17 |
| 3.4.5 | Cochrane Central Register of Controlled Trials (CENTRAL) via Cochrane Library | 17 |
| 3.5   | Search filters                                                                | 18 |
| 4     | Quality assurance and search strategy peer review                             | 18 |
| 4.1   | Validation of search strategies                                               | 18 |
| 4.2   | Search peer review                                                            | 19 |
| 5     | Reporting and record management                                               | 20 |
| 5.1   | Search reporting                                                              | 20 |
| 5.2   | Record management                                                             | 20 |
| 5.3   | Deduplication of search results                                               | 21 |

## 1 Preparation and planning

### 1.1 Involvement of information specialists

The involvement of information specialists (or librarians) is widely recommended in systematic search guidance.<sup>1-4</sup>

In the restricted timeframe of a rapid review (RR), author teams might fear that involving such an expert causes unnecessary delays and try to save time by designing and running the searches themselves. However, information specialist involvement can save time and improve review quality in the long run.<sup>5-9</sup> Because RR searches should be conducted as efficiently as possible, it is advisable to involve an information specialist that already has experience in conducting systematic searches:

- Having more routine, experienced searchers can develop and conduct searches more efficiently and are less likely to make grave errors;
- they can assist with formulating searchable review questions;
- they are more likely to be familiar with a wide range of information sources and methods and able to assess their suitability for the RR topic;
- they are more likely to be familiar with search reporting and quality assurance standards.

### 1.2 Preliminary searches

Taking time to plan and prepare the search process adequately will save time in later review steps. A crucial step is conducting preliminary/scoping/exploratory searches<sup>1,10</sup> to:

- 1) improve the topic understanding and refine the key questions,
- 2) identify existing systematic reviews (SR) and a first set of potentially relevant primary studies (“known relevant records”), and
- 3) estimate the resources necessary to perform the RR.

Unlike the systematic search proper, these searches are not usually documented or reported in the final review report. They do not have to meet the systematic search's standards for transparency and reproducibility. However, a limited documentation of the preliminary search process can be useful, in particular for broad or complex topics where the refinement of the research question may take several iterations.

An important step for preliminary searching is identifying existing SRs. If a recent SR on the topic already exists, conducting an RR may be unnecessary. However, updating an older SR can also be a viable approach for an RR.

SRs can also be mined for included studies that are likely to be eligible for the new RR (i.e., known relevant records). In this case, the existing SR does not need to investigate the same question as the planned RR. It only has to include some studies that could be eligible for the planned RR.

Useful sources to find SRs are:

- Cochrane Database of Systematic Reviews (<https://www.cochranelibrary.com/>)
- Epistemonikos (<https://www.epistemonikos.org/>)
- Health Evidence (<https://www.healthevidence.org/>)
- International HTA database (<https://database.inahta.org/>)
- KSR Evidence (<https://ksrevidence.com/>)
- PubMed (using the Systematic Reviews filter) (<https://pubmed.ncbi.nlm.nih.gov/>)
- Trip Database (<https://www.tripdatabase.com/>)



Preliminary searches are usually iterative. If no SRs are found, highly precise search queries can be used to find a few promising primary studies. For this step, an information source that allows sorting by relevance or “best match” is useful, for example, PubMed (<https://pubmed.ncbi.nlm.nih.gov/>) or Google Scholar (<https://scholar.google.com/>).

Based on these known, and potentially relevant studies, a citation-based search method can be used. This means using "seed articles" to identify further citations of interest. Citation-based search methods include: backward citation searches (i.e., reference list checking) and forward citation searches (i.e. "cited by" searching);<sup>11</sup> co-cited references (i.e., articles that are cited together with the seed article) and co-citing references (i.e., articles that share similar reference lists with the seed article);<sup>11</sup> and similar article functions in databases and search engines<sup>12</sup>. The advantage of collecting studies included in SRs and other citation-based methods is that the search results are not produced by search terms the searcher chooses. Thus, the known relevant records are less likely to be biased by the terminology the searcher is already aware of. (This is important if search terms for the systematic search strategy are based on text analysis of known relevant records.)

Some useful sources for citation-based searches are:

- CoCites (<https://www.cocites.com/>, co-cited references)
- Connected Papers (<https://www.connectedpapers.com>, similarity based co-cited references & co-citing references)
- Google Scholar (<https://scholar.google.com/>, similar articles, forward citation searching)
- Lens.org Scholarly Search and Analysis (<https://www.lens.org/lens/search/scholar/structured>, backward & forward citation searching, similar articles)
- PubMed (<https://pubmed.ncbi.nlm.nih.gov/>, backward & forward citation searching, similar articles)
- Scopus (backward & forward citation searching, co-citing references; subscription required)
- Web of Science (backward & forward citation searching, co-citing references; subscription required)

Academic search engines that use artificial intelligence/machine learning support to generate search results may also be useful in preliminary searches. Their functionalities tend to be suited to simple, precision focused searches that do not require high sensitivity, reproducibility or transparency. Like citation-based searches, these search engines can help to find literature that does not contain the specific search terms the searcher chooses.

Some examples are:

- Elicit: <https://elicit.org/>
- Scite\_: <https://scite.ai/>
- Semantic Scholar: <https://www.semanticscholar.org/>

### 1.3 Known relevant records

At the end of the preliminary search process, a set of studies that meet the RR eligibility criteria at the abstract level should be available. The aim for these “known relevant records” is to be as representative of the evidence base as possible. This is particularly important if text analysis methods are to be used for search term identification.<sup>13</sup> In this regard, studies identified through previous SRs are particularly useful to get a broad picture of the evidence available.

These known relevant records can be further used to 1) test the coverage of chosen databases (i.e., Are relevant records available in this database?), 2) identify relevant search terms, 3) test the

performance of search strategies (i.e., Does the search find the relevant studies?), and 4) as a starting point for some additional search methods (e.g., citation and similar articles searching).

The optimal number of known relevant records depends largely on the scope of the topic and the terminological variety: A topic like the "effectiveness of Mogamulizumab in Cutaneous T-cell lymphoma" is both focussed and has a low terminological variety. This means a small set of records may be representative of the entire evidence base. On the other hand, the topic of "methods for reducing aggression in psychiatric wards" is likely to use a more varied terminology, because eligible studies will likely contain a wide variety of interventions (e.g., pharmacological, behavioural, administrative). In this case, a larger set of records may be necessary to represent the evidence base.

Depending on these considerations, we suggest aiming for 5-20 references for the set of known relevant records.

## 2 Information sources and search methods

In SRs, a comprehensive search process maximises the likelihood of finding all topic-relevant studies, both published and unpublished (i.e., grey literature). This is achieved using multiple information sources, including bibliographic databases and supplementary methods. One advantage of this approach is, that because of the content-overlap between the various sources, relevant studies missed by one search (e.g., a MEDLINE search strategy) are likely to be picked up by another search (e.g., a CENTRAL search strategy, reviewing reference lists of existing reviews, etc.). For this reason, MECIR<sup>14</sup> requires 'stacking' of sources, and defines a topic-independent minimum set of sources comprised of bibliographic databases (i.e., MEDLINE, EMBASE, CENTRAL), study registers (i.e., ClinicalTrials.gov, WHO ICTRP), and citation-based searching (i.e., reference lists of included studies). To these standard sources, additional sources need be added depending on the topic (e.g., a topic-specific bibliographic database). That way, even if some of these sources do not have a high topic coverage, or if a single search strategy is not very sensitive, the combination of all sources increases the likelihood of finding all topic-relevant studies.

In RRs, reducing the number of information sources used is a practical way to reduce the time spent on searching and the size of the search result. However, this can impact the sensitivity of searches. While a lower degree of certainty in RR conclusions is an acceptable trade-off for quicker results, RR searches still aim for high enough sensitivity to draw conclusions.<sup>15</sup>

This means it is essential that RR searches select information sources and search methods that are most likely to identify relevant studies.

Retrospective studies have shown that, on average, MEDLINE in particular has very high coverage of studies included in healthcare SRs.<sup>16-18</sup> This also indicates that grey literature often plays a minor role in SRs. However, when selecting a limited number of information sources for RRs, several important caveats must be considered.

### 2.1 General considerations for selection of RR information sources

- The coverage of MEDLINE can vary widely across topics. For example, Frandsen et al.<sup>17</sup> found that Cochrane reviews of the Cystic Fibrosis and Genetic Disorders Group had an average PubMed coverage of less than 50%. Levay et al.<sup>19</sup> found an even lower coverage for some NICE public health reviews due to the large percentage of grey literature included in the reviews.
- Coverage is not the same as sensitivity. While a high percentage of relevant studies are often available in MEDLINE, that does not mean a search strategy will identify them with a manageable number of results. Consequently, studies show that combining two MECIR

databases is more likely to find a high percentage of relevant literature than a single database.<sup>16</sup>

- Depending on the topic, specialised or transdisciplinary databases can play an important role. For example, the combination of CINAHL and MEDLINE has been shown to be efficient in finding qualitative studies in diabetes.<sup>20</sup> In contrast, PsycInfo had the highest coverage for faith-based mental health interventions,<sup>21</sup> and Scopus and Web of Science had the highest coverage of health care management research.<sup>22</sup> An analysis of NICE public health guidelines<sup>23</sup> showed that MEDLINE and Embase were part of the minimum required databases to find all included studies. However, the full set of minimum required information sources varied by topic, and always included supplementary search techniques, in particular website searching. (See COVID-19 below as an example of a topic where less common information sources should be considered.)
- Research that evaluates the impact of information sources on the results or conclusions of SRs (as opposed to search sensitivity), is based mainly on recalculating meta-analyses of RCTs simulating different search approaches.<sup>15,24,25</sup> It is not clear how applicable those findings are to SRs without meta-analyses or SRs relying on other study designs. (See example below for relevant information sources for reviews of RCTs.)

## 2.2 Example: Reviews based on randomised controlled trials (RCTs)

Information sources and search methods for reviews of RCTs are relatively well-researched. This makes it possible to make some evidence-based decisions on streamlined search approaches.

### 2.2.1 What is known

- Most Cochrane intervention reviews include RCTs only. Limiting meta-analyses of these reviews to studies [available](#) in MEDLINE only changes the results in rare cases.<sup>24,25</sup>
- MEDLINE, Embase, and CENTRAL each have very high coverage of RCTs, and combining any two of these databases is usually enough to find a majority of available RCTs. This combination often suffices to arrive at the same review conclusions as a comprehensive search.<sup>15</sup>
- A large number of validated RCT search filters for MEDLINE exist.<sup>26</sup> There are also various search filters for most other commonly used databases.<sup>27</sup>
- CENTRAL is a database for RCTs and quasi-RCTs. This means no search filter is necessary. Unlike MEDLINE and Embase, CENTRAL also contains grey literature, in particular study register entries and conference abstracts.<sup>28</sup> It has a very high coverage of RCTs but is updated less frequently than databases like MEDLINE or Embase.<sup>29</sup>
- In general, RCTs are more likely to be published than observational studies.<sup>30</sup> In most cases, excluding grey literature has little to no effect on meta-analyses of RCTs.<sup>31-33</sup> Of the different types of grey literature, excluding conference abstracts seems to have the least impact.<sup>32</sup>
- The vast majority of RCTs of newly approved drugs are registered in ClinicalTrials.gov and can be found in this study register.<sup>34</sup> Non-pharmacological RCTs seem to be less consistently registered in ClinicalTrials.gov.<sup>35</sup>
- ClinicalTrials.gov does not only include prospective study registration data. In some cases, results are also available. Additionally, PubMed-indexed articles containing an NCT Number will automatically be listed on the ClinicalTrials.gov entry.<sup>36</sup>

- Follow up of eligible study register entries is a practical way to identify completed pharmacological trials missed by database searches, but rarely affects the results of meta-analyses.<sup>37</sup>
- Combining a single database search with reference list checking of included articles will improve search sensitivity. However, combining MEDLINE and reference list checking might be less effective than combining the method with Embase or CENTRAL search strategies.<sup>15</sup>
- The combination of a simple MEDLINE search plus PubMed Similar Articles based on selected studies has been shown to be an effective search approach for updating SRs based on RCTs on clinically-focused topics.<sup>12,38</sup> There is some indication that this approach also works for newly created reviews on clinically-focused topics.<sup>39</sup>

### 2.2.2 Possible streamlined search approaches

- For RRs based on RCTs, combining two of the MECIR-required databases (i.e., MEDLINE, CENTRAL, Embase) is likely to be the most robust approach.
- However, depending on the topic, combining MEDLINE with a supplementary search technique may also be acceptable. This has the advantage that access to both MEDLINE via PubMed and supplementary sources like ClinicalTrials.gov and PubMed similar articles is free.

## 2.3 Example: COVID-19 reviews

The COVID-19 pandemic is an example of a rapidly evolving topic. This means on the one hand, that search approaches developed for more stable topics are not necessarily effective. On the other hand, search approaches for COVID-19 topics also changed over time because information sources, publishing characteristics, etc. changed.

### 2.3.1 What is known

- At the beginning of the pandemic, there was no standardized terminology for Sars-Cov-2/COVID-19, leading to a large variety of potential search terms. Standardised subject headings for MEDLINE and Embase only became available after several months.<sup>40</sup>
- Analyses up to the 2<sup>nd</sup> quarter of 2020 show that the majority of Sars-Cov-2/COVID-19 research findings was available through pre-prints, not published (peer-reviewed) journal articles.<sup>41,42</sup> Of the available journal articles, about a quarter were Chinese.<sup>41</sup> Most study results used in the Cochrane living systematic review and network meta-analysis on COVID-19 (COVID-NMA) came from pre-prints.<sup>43</sup>
- In early SRs, RCTs played a minor role. The most commonly included study design were cohort studies.<sup>44</sup> Modelling studies also played an important role.<sup>45</sup>
- The vast majority of registered Covid-19 RCTs seem to concern pharmacological topics.<sup>46,47</sup>
- Available specialised information sources and their search functions changed over time, meaning that search approaches for review updates needed to be adapted constantly.<sup>45</sup>
- At the time of writing (March 2022), there are several databases for COVID-19/Sars-Cov-2. Typically, these are meta-databases that collect references to published articles, preprints, and study register entries from various sources. Some examples are:
  - Cochrane COVID-19 Study Register (<https://COVID-19.cochrane.org/>),
  - COVID-19 L·OVE (<https://app.iloveevidence.com/loves/5e6fdb9669c00e4ac072701d>),
  - COVID-NMA (<https://covid-nma.com/>)
  - WHO COVID-19 Global literature on coronavirus disease (<https://search.bvsalud.org/global-literature-on-novel-coronavirus-2019-ncov/>)

- Some evaluations of coverage of COVID-19 L-OVE and the Cochrane COVID-19 Study Register are available.<sup>48-50</sup> Based on studies included in SRs, both had very high coverage, with L-OVE containing nearly all cited studies.
- There are various Sars-Cov-2/COVID-19 search strategies available for MEDLINE, Embase, and other healthcare research databases<sup>51,52</sup>, but there are no current validated search filters at the time of writing. Database providers have also incorporated search filters into their interfaces.<sup>53-55</sup>
- As of 2021, the National Institute for Health and Care Excellence (NICE) conducted a single comprehensive weekly surveillance search for all of their COVID-19 rapid guidelines instead of separate searches for each topic.<sup>40</sup>

### 2.3.2 Considerations for streamlined search approaches

- Many analyses of document types, study designs, and information sources are based on analyses of data from 2020 and might not reflect the current situation.
- Available information sources and their functionalities have changed throughout the pandemic. Searchers preparing or updating a search on a COVID-19 topic should first understand the currently available sources and not solely rely on what worked in the past.
- Currently, there are several high-coverage specialised databases. Searches should use at least one of them. A combination of two specialised databases is likely to retrieve almost all available evidence.
- The evidence base is still evolving rapidly, so RR searches should include pre-prints to find the most recent study results. For pharmacological topics, study registers can also be a useful information source.

## 2.4 Testing the coverage of the intended primary database

Databases generally release information about their scope and coverage of journals or topics.<sup>56-58</sup> Additionally, methods studies assessing coverage of databases for specific use-cases are often available.<sup>16,17,22,49</sup> Searchers should be aware of the general coverage of the databases they intend to use.

To assess the usefulness of databases for a specific RR, known relevant records identified during the preliminary search can be used. In particular, it is helpful to search these records in the intended primary database (i.e., the database where the search strategy is developed, usually MEDLINE). The Accession Number (e.g., PMID in MEDLINE) should be recorded if they are available in the database. (The Accession Numbers will be later used to validate the search strategy, see next chapter.)

Ideally, the primary database should contain most if not all published known relevant records. This is to make sure that the primary database is highly relevant for the chosen topic: Suppose a large percentage of these known records are not available in the selected database. In that case, the searcher needs to assess why this is the case and consider the implication for selecting information sources. For example, if the missing records are published journal articles but not available in the assessed database, it is important to check if there is another bibliographic database with higher topic coverage. Conversely, if the majority of missing records are grey literature, supplementary searches might be important to answer the research question.

## 3 Search strategies

The construction of a search strategy to optimise the balance between sensitivity and specificity according to the intended purpose of the search is critical to all evidence synthesis products. Achieving this balance is even more important in the context of an RR. A strategy retrieving too many search results is prohibitive in terms of the time to screen results. Conversely, a strategy with too

many limitations and a correspondingly small result set undermines confidence in findings, limiting the capacity of a decision-maker to make recommendations for action.<sup>15</sup>

### 3.1 Text analysis

Tools such as PubMed PubReminer (<https://hgserver2.amc.nl/cgi-bin/miner/miner2.cgi>), Systematic Review Accelerator Word Frequency Analyzer(<https://sr-accelerator.com/#/>), or Voyant Tools(<https://voyant-tools.org/>) can be used to identify terms or subject headings that frequently appear in the known relevant records found by preliminary searching. This analysis can inform the selection of the most relevant search terms for a topic.

In general, there are two ways to use this type of analysis for search strategy development. First, as support for selecting search terms that will also be supplemented by other means (e.g., synonyms listed for MeSH or Emtree terms, the inclusion of word variants that did not appear in the known relevant records) and secondly, as a unique source of search terms in an "objectively-derived" search strategy.<sup>59,60</sup> For the objective approach, the known relevant records (called "test set") have to be a "quasi-gold standard" (i.e., they must be representative of the of the evidence available for the research question). A truly objectively-derived search strategy also needs prospectively defined rules for the inclusion of terms into to the search strategy.

Note that even methods that automatically generate Boolean queries require substantial human input to be effective (e.g., to identify relevant concepts and terms<sup>61</sup>, to refine automatically generated queries<sup>62</sup>).

Overall, text analysis methods can improve the sensitivity of search strategies and accelerate search strategy development.<sup>59,63</sup> However, the gains likely depend on the techniques used, the experience of the searcher with the technology, and the test set quality.<sup>64</sup>

Appendix B lists references to guidance for using text analysis in search strategy development.

### 3.2 Improving search precision and sensitivity

An important way to reduce the number of records retrieved by a database search is to increase search precision without sacrificing too much sensitivity.

For SRs it is not uncommon to present all search terms for a particular element (e.g., population) within a single search string. This assumes that each term is equally useful in retrieving relevant references. A more appropriate approach for RRs is to assume diminishing returns as one moves from core terms to less useful ones. Dividing search terms for each element into "definites", "probables" and "possibles" allows you to calibrate your strategy for relevance and numbers of results. Text analysis can be useful to identify which terms are most commonly used to describe a particular element in the literature. For example, "heart failure", "cardiac failure", and "myocardial failure" are synonyms. But "heart failure" is the most commonly used, making it a "definite" search term. "Cardiac failure" is not as common and would be a "probable" search term. "Myocardial failure" is very rarely used and could be a "possible" search term. Omitting such a possible search term from the search strategy is likely to reduce the size of the search result without losing relevant studies.

The impact of adding and removing search terms should be evaluated during search strategy development. So, for example, you might decide only to use "definites" for the population while using "definites" and "probables" for the intervention. Two important considerations in that regard are the sensitivity – are known relevant records retrieved? – and the number of search results generated by each set. This process is closely related to validating the search strategy using known relevant records.

The Table 1 shows an example of how dividing search terms can be used to evaluate the sensitivity and precision of different search term configurations. Result 1, using definite terms, has a sensitivity of 81% and a precision of 9% based on the known relevant records. Result 2, using definite and probable terms, has a sensitivity of 92% and precision of 9%. Result 3 adds possible terms and has 100% sensitivity and 4% precision. This means including the “probable” search terms (Result 2) increased sensitivity without sacrificing precision, making it the most efficient option. Note that while Result 3 found two additional known relevant records, the number of overall results increased by 2.6 times from 267 to 698. This is a huge increase compared to Result 2, which only adds 31 records to Result 1.

Table 1: Ovid MEDLINE Search strategy: contraceptive use and exercise performance

|                                                    | #         | Searches                                                                                                                                                                                                                                                                                                                                                                       | Results    |
|----------------------------------------------------|-----------|--------------------------------------------------------------------------------------------------------------------------------------------------------------------------------------------------------------------------------------------------------------------------------------------------------------------------------------------------------------------------------|------------|
| Element 1: oral contraceptive use                  | 1         | exp Contraceptives, Oral/                                                                                                                                                                                                                                                                                                                                                      | 51105      |
|                                                    | 2         | (oral adj (contraceptiv* or estradiol or progestin or progesterone or progesterone)).ti,ab,kf.                                                                                                                                                                                                                                                                                 | 27279      |
|                                                    | 3         | 1 or 2                                                                                                                                                                                                                                                                                                                                                                         | 60719      |
| Element 2: exercise performance - <i>definites</i> | 4         | exp Athletic Performance/                                                                                                                                                                                                                                                                                                                                                      | 59804      |
|                                                    | 5         | exp Physical Endurance/                                                                                                                                                                                                                                                                                                                                                        | 36115      |
|                                                    | 6         | Exercise Test/                                                                                                                                                                                                                                                                                                                                                                 | 66882      |
|                                                    | 7         | Muscle Strength/                                                                                                                                                                                                                                                                                                                                                               | 24054      |
|                                                    | 8         | (exercise adj2 (performance or response? or recovery or exhaustion or tolerance or test*)).ti,ab,kf.                                                                                                                                                                                                                                                                           | 57349      |
|                                                    | 9         | (endurance adj1 (physical or performance or test*)).ti,ab,kf.                                                                                                                                                                                                                                                                                                                  | 3974       |
|                                                    | 10        | (fitness adj1 (physical or cardio*)).ti,ab,kf.                                                                                                                                                                                                                                                                                                                                 | 18970      |
|                                                    | 11        | or/4-10                                                                                                                                                                                                                                                                                                                                                                        | 176527     |
| <b>Result 1</b>                                    | <b>12</b> | <b>3 and 11</b>                                                                                                                                                                                                                                                                                                                                                                | <b>236</b> |
| Element 2: exercise performance - <i>probables</i> | 13        | (peak adj4 (performance or output or capacity)).ti,ab,kf.                                                                                                                                                                                                                                                                                                                      | 8172       |
|                                                    | 14        | ((anaerobic or aerobic) adj (capacity or power)).ti,ab,kf.                                                                                                                                                                                                                                                                                                                     | 9049       |
|                                                    | 15        | (vo2peak or vo2max or "v'o2peak" or "v'o2max").ti,ab,kf.                                                                                                                                                                                                                                                                                                                       | 12988      |
|                                                    | 16        | ((max* or peak) adj2 (muscle action? or force production)).ti,ab,kf.                                                                                                                                                                                                                                                                                                           | 540        |
|                                                    | 17        | (muscle adj (recovery or strength)).ti,ab,kf.                                                                                                                                                                                                                                                                                                                                  | 26673      |
|                                                    | 18        | cardiorespiratory response.ti,ab,kf.                                                                                                                                                                                                                                                                                                                                           | 360        |
|                                                    | 19        | or/13-18                                                                                                                                                                                                                                                                                                                                                                       | 53544      |
| <b>Result 2</b>                                    | <b>20</b> | <b>3 and (11 or 19)</b>                                                                                                                                                                                                                                                                                                                                                        | <b>267</b> |
| Element 2: exercise performance - <i>possibles</i> | 21        | exp Exercise/                                                                                                                                                                                                                                                                                                                                                                  | 226979     |
|                                                    | 22        | exp Sports/                                                                                                                                                                                                                                                                                                                                                                    | 203054     |
|                                                    | 23        | (exercise or sport? or physical* activ*).ti,kf.                                                                                                                                                                                                                                                                                                                                | 221780     |
|                                                    | 24        | or/21-23                                                                                                                                                                                                                                                                                                                                                                       | 426679     |
| <b>Result 3</b>                                    | <b>25</b> | <b>3 and (11 or 19 or 24)</b>                                                                                                                                                                                                                                                                                                                                                  | <b>698</b> |
| Known relevant records                             | 26        | ("32666247" or "31663173" or "31686212" or "30167957" or "28906053" or "28497386" or "27898641" or "25694209" or "25519952" or "24504652" or "22996028" or "22948447" or "22446669" or "22403922" or "21848445" or "21399539" or "20227547" or "18054842" or "17990209" or "17157107" or "16596112" or "15598669" or "15618333" or "14707778" or "12706609" or "12381756").ui. | 26         |
| Found by R1                                        | 27        | 12 and 26                                                                                                                                                                                                                                                                                                                                                                      | 21         |
| Found by R2                                        | 28        | 20 and 26                                                                                                                                                                                                                                                                                                                                                                      | 24         |
| Found by R3                                        | 29        | 25 and 26                                                                                                                                                                                                                                                                                                                                                                      | 26         |
| Difference R2/R1                                   | 30        | 20 not 12                                                                                                                                                                                                                                                                                                                                                                      | 29         |
| R1 Mesh-only                                       | 31        | (3 and (4 or 5 or 6)) not (8 or 9 or 10)                                                                                                                                                                                                                                                                                                                                       | 88         |
| R1 free-text only                                  | 32        | (3 and (8 or 9 or 10)) not (4 or 5 or 6)                                                                                                                                                                                                                                                                                                                                       | 76         |

For search strategies developed in PubMed, Systematic Review Accelerator SearchRefinery (<https://sr-accelerator.com/#/>) can also be used to assess the sensitivity and precision of each search term in a search strategy. The tool visualizes how many records each term retrieves and how many of the benchmark records it finds, making it easier to decide which terms to remove from the search string.

If the representativeness of the known relevant records is uncertain, another option is to review the difference in search results.<sup>65</sup> Query 30 in Table 1 retrieves only records found by Result 2 but not Result 1. The searcher can assess the relevance of these records by reviewing the top results for the query. If it contains articles that are likely to be eligible, these search terms should be included in the final search strategy. Query 31 shows articles in Result 1 that were retrieved by the MeSH search but do not contain the “definitive” free-text search terms. Conversely, query 32 shows Result 1 articles retrieved by the free-text search, not the MeSH search. These results can be reviewed for additional free-text search terms (query 31) or MeSH terms (query 32) that could be used in search strategy.

### 3.2.1 Database/Interface-specific search functionalities

The functionalities of the database (e.g., MEDLINE, Embase) and interface (e.g., Ovid, ProQuest) also play an important part in improving the balance of search sensitivity and precision:

- Most database interfaces offer proximity/adjacency operators. These operators allow to set a maximum distance between two search terms. They are more precise than AND-combinations but less restrictive than phrases. They can be used to cover a wider variety of phrase combinations. For example, the Ovid MEDLINE query (*exercise adj2 response?*).*ti,ab* finds "exercise response", "exercise responses", "response to exercise", "responses to exercise", etc.
- Most databases with a controlled vocabulary offer the option to restrict subject headings to records where they are the focus of the article (e.g., major descriptors in MeSH).
- Limiting free-text terms to occurrence in the title also can improve search precision: The most important concepts of a study are often mentioned in the title. For example, searching for *exercise.ti* will mainly retrieve articles where exercise is the focus of the study.
- Ovid interfaces also offer a frequency operator, which allows a searcher to define a minimum number of times a term has to appear in a certain field. For example, *methods.ab./freq=2* will only retrieve articles where the word “methods” appears at least twice in the abstract. This helps to retrieve articles of methods research: Structured abstracts will mention “methods” at least once. However, if the word appears more than once, it is more likely that topic of the article is methods research.

It is also important to note that search functionalities, syntax, subject headings, and even coverage may change over time. Searchers need to keep up with these changes to ensure the correct use of the database/interface.

### 3.3 Translating search strategies

When translating a primary search strategy to different databases/interfaces, using Systematic Review Accelerator Polyglot Search (<https://sr-accelerator.com/#/>) for automated syntax translation can reduce time and translation errors.<sup>65,66</sup> However, some manual adjustments are generally still necessary. For example, subject headings will need to be reviewed manually because they are database specific (e.g., MeSH and Emtree are similar, but the terms are not identical). Additionally, some elements of the search strategy may not be relevant for all subsequent databases (e.g., using an RCT filter in CENTRAL is unnecessary).



### 3.4 Removing specific document types from database search results

To efficiently design search strategies, knowledge of the type of database contents is essential. Some databases include conference abstracts, study register entries, theses and dissertations, or other non-research publications (e.g., book reviews). It therefore may be sensible to exclude some document types from the search result.

Below are some examples for database- and interface-specific strategies to exclude results by document type.

#### 3.4.1 Ovid MEDLINE

- Remove animal studies: *not (animals/ not humans/)*
- Limit to database entry dates (this is not the same as publication date!):  
*and YYYYMMDD:3000.(dt)*. Example: *and 20180115:3000.(dt)*.  
The Create Date (DT) field contains the date when it was added to PubMed.  
<https://ospguides.ovid.com/OSPguides/medline.htm#DT>
- Remove animal studies, comments, editorials, reviews, guidelines, and case reports:  
*not ((animals/ not humans/) or comment/ or editorial/ or exp review/ or meta analysis/ or consensus/ or exp guideline/ or hi.fs. or case report.mp.)*  
When using this string please cite: Waffenschmidt S, Navarro-Ruan T, Hobson N et al. Development and validation of study filters for identifying controlled non-randomized studies in PubMed and Ovid MEDLINE. Res Synth Methods 2020; 11(5): 617-626.  
<https://dx.doi.org/10.1002/jrsm.1425>

#### 3.4.2 Ovid Embase

- Remove MEDLINE records: *not medline.cr*.
- Remove animal studies: *not (exp animal/ not exp human/)*
- Remove conference abstracts or conference reviews: *not (Conference Abstract or Conference Review).pt*.
- Limit to database entry dates (this is not the same as publication date!):  
*and YYYYMMDD:3000.(dc)*. Example: *and 20180115:3000.(dc)*.  
The Date Created (DC) field contains the date of the last activity on the citation before creation of an XML file for delivery to Ovid. The date is loaded from the Elsevier XML element <date-created>. <https://ospguides.ovid.com/OSPguides/embase.htm#dc>

#### 3.4.3 Embase.com

- Remove conference abstracts: *NOT 'conference abstract'/it*
- Remove records that are directly imported from MEDLINE:  
*NOT [medline]/lim NOT ([embase classic]/lim AND [medline]/lim)*
- Remove preprints: *NOT [preprint]/lim*

#### 3.4.4 Scopus.com

- Remove MEDLINE records: *AND NOT INDEX(medline)*

#### 3.4.5 Cochrane Central Register of Controlled Trials (CENTRAL) via Cochrane Library

- Remove study register records:  
*not (clinicaltrials or trialsearch or ANZCTR or ensaiosclinicos or chictr or cris or cri or registroclinico or clinicaltrialsregister or DRKS or IRCT or rctportal or JapicCTI or JMACCT or jRCT or JPRN or UMIN or trialregister or PACTR or REPEC or SLCTR):so*
- Remove conference abstracts: *not (conference:pt or abstract:so)*
- Remove non-english records:

*not ((language next (afr or ara or aze or bos or bul or car or cat or chi or cze or dan or dut or es or est or fin or fre or ger or german or gre or heb or hrv or hun or ice or ira or ita or jpn or ko or kor or lit or nor or peo or per or pol or por or pt or rom or rum or rus or slo or slv or spa or srp or swe or tha or tur or ukr or urd or uzb)) not (language near/2 (en or eng or english or mul or unknown))))*

### 3.5 Search filters

Validated search filters are database- and interface-specific search queries that can be used in a larger search strategy (e.g., to identify study designs). Their sensitivity, specificity, and precision has been assessed, and often two or more versions of a filter exist: one focusing on sensitivity, one on specificity, and one “best balance option”. In SRs, the most sensitive filter is often chosen, but depending on the topic and the number of search results, a specificity-maximizing or “best balance” filter could be the better option for an RR.

The impact of a search filter on a specific search strategy can be assessed in the same way as the search term selection shown in Table 1. Depending on the size of the unfiltered search result, a more sensitive or a more precise filter could be chosen to achieve a manageable search result. For example, the search Result in Table 2 (query 12) retrieves less than 300 records without a study design filter. If we want to limit the search to RCTs, using the Cochrane sensitivity-maximizing RCT filter<sup>67</sup> (96% sensitivity, 14% precision)<sup>26</sup> will ensure that we miss very few eligible RCTs while still having a reasonably small search result. If the unfiltered search result was 3000 records, using the Cochrane Sensitivity and precision maximizing RCT filter<sup>67</sup> (sensitivity 93%, 46% precision)<sup>26</sup> might be preferable. It is slightly less sensitive but more precise and will thus reduce the search considerably.

The InterTASC Information Specialists' Sub-Group (ISSG) Search Filter Resource (<https://sites.google.com/a/york.ac.uk/issg-search-filters-resource/home>) collects validated and unvalidated search filters. It also provides a list of publications that have evaluated the performance of some search filters and links to literature related to search filters (e.g., impact on search results, utility of built-in filters).

A newer approach to identifying particular study designs are machine learning classifiers.<sup>68</sup> These are sometimes integrated into systematic review production platforms (e.g., EPPI-Reviewer<sup>69</sup>) and can be applied to uploaded search results.<sup>70</sup>

## 4 Quality assurance and search strategy peer review

### 4.1 Validation of search strategies

We recommend that the primary database search strategy is validated using known relevant records. This is usually part of the search strategy development and means testing if the primary search strategy retrieves known relevant records found through preliminary searching. If some known relevant records are not identified, the searcher has to assess the reasons and decide if revisions are necessary and feasible. Note that improving the sensitivity of a search will increase the size of the search result. Using known relevant records to assess the search result makes it easier to find a balance of sensitivity and precision appropriate for the specific RR project.

We recommend that a search strategy that optimizes precision and sensitivity aims to identify at least 80-90% of known relevant records. This recommendation is based on benchmarks commonly used in developing validated search filters. Search filters generally aim for 95% sensitivity or more for

highly sensitive filters, but sensitivity-precision-maximising filters tend to have a sensitivity of 80% or more.<sup>71,72</sup>

However, using such a cut-off for general search strategy development depends on the known relevant records found by the preliminary search. If the searcher is not confident that the set is fairly representative of the available evidence, it is advisable to aim for retrieval of all known relevant records.

Table 2 shows assessment steps of a search strategy. The search finds 81% of the 26 known relevant records (query 14), which is slightly above the proposed cut-off. Further investigation shows that Element 1 finds all known records (query 15), but Element 2 misses 5 (query 16). These 5 records should be assessed to determine what terminologies are used to describe the concept of “exercise performance”. The next step would be adding these additional search terms to the search strategy and evaluating if the sensitivity can be improved without a large increase in the number of records retrieved.

Table 2: Assessment of an Ovid MEDLINE search strategy: contraceptive use and exercise performance

|                                   | #         | Searches                                                                                                                                                                                                                                                                                                                                                                       | Results  |
|-----------------------------------|-----------|--------------------------------------------------------------------------------------------------------------------------------------------------------------------------------------------------------------------------------------------------------------------------------------------------------------------------------------------------------------------------------|----------|
| Element 1: oral contraceptive use | 1         | exp Contraceptives, Oral/                                                                                                                                                                                                                                                                                                                                                      | 51105    |
|                                   | 2         | (oral adj (contraceptiv* or estradiol or progestin or progestogen or progesterone)).ti,ab,kf.                                                                                                                                                                                                                                                                                  | 27279    |
|                                   | 3         | 1 or 2                                                                                                                                                                                                                                                                                                                                                                         | 60719    |
| Element 2: exercise performance   | 4         | exp Athletic Performance/                                                                                                                                                                                                                                                                                                                                                      | 59804    |
|                                   | 5         | exp Physical Endurance/                                                                                                                                                                                                                                                                                                                                                        | 36115    |
|                                   | 6         | Exercise Test/                                                                                                                                                                                                                                                                                                                                                                 | 66882    |
|                                   | 7         | Muscle Strength/                                                                                                                                                                                                                                                                                                                                                               | 24054    |
|                                   | 8         | (exercise adj2 (performance or response? or recovery or exhaustion or tolerance or test*)).ti,ab,kf.                                                                                                                                                                                                                                                                           | 57349    |
|                                   | 9         | (endurance adj1 (physical or performance or test*)).ti,ab,kf.                                                                                                                                                                                                                                                                                                                  | 3974     |
|                                   | 10        | (fitness adj1 (physical or cardio*)).ti,ab,kf.                                                                                                                                                                                                                                                                                                                                 | 18970    |
|                                   | 11        | or/4-10                                                                                                                                                                                                                                                                                                                                                                        | 176527   |
| Result                            | 12        | 3 and 11                                                                                                                                                                                                                                                                                                                                                                       | 236      |
| Known relevant records            | 13        | ("32666247" or "31663173" or "31686212" or "30167957" or "28906053" or "28497386" or "27898641" or "25694209" or "25519952" or "24504652" or "22996028" or "22948447" or "22446669" or "22403922" or "21848445" or "21399539" or "20227547" or "18054842" or "17990209" or "17157107" or "16596112" or "15598669" or "15618333" or "14707778" or "12706609" or "12381756").ui. | 26       |
| Found by Result                   | 14        | 12 and 13                                                                                                                                                                                                                                                                                                                                                                      | 21       |
| Found by E1                       | 15        | 3 and 13                                                                                                                                                                                                                                                                                                                                                                       | 26       |
| Found by E2                       | 16        | 11 and 13                                                                                                                                                                                                                                                                                                                                                                      | 21       |
| <b>NOT found by E2</b>            | <b>17</b> | <b>13 not 16</b>                                                                                                                                                                                                                                                                                                                                                               | <b>5</b> |

#### 4.2 Search peer review

The Peer Review Electronic Search Strategies (PRESS) checklist<sup>73</sup> is a tool for information specialists/librarians. It assesses six domains of the database search strategy design: translation of the research question; use of Boolean and proximity operators; use of subject headings; implementation of text word searching ; errors in spelling, syntax, and line numbers; and use of limits and filters.

Because it is a specialist tool, both the searcher and the person reviewing the search should be experts who are familiar with the methods and vocabulary of systematic searching. In cases where search experts review non-expert searches, using a more individualized approach adjusted to the searcher's knowledge base might be necessary.

PRESS also only focusses on the database search strategy itself. Another important consideration is the appropriateness of the information sources overall. RRs that limit the number of information sources have to select the most likely sources to find relevant studies. For this reason, search peer reviewers should also assess whether the chosen sources or methods are likely to have high coverage of the relevant evidence and allow for the creation of sensitivity-and-precision-optimising searches.

A major reason for not conducting search peer review in RRs are concerns about turn-around time for the full process of finding a peer reviewer, giving the peer reviewer time to assess the search, and implementing changes suggested in peer review. However, if in-house information specialists are available, this turn-around time will usually be less than a day. In other cases, it is advisable to plan ahead by contacting potential peer reviewers as soon as work on the RR begins and agree on deadlines for delivery of the search strategy and feedback.

If expert peer review is not at all possible within the time frame, quality assurance is still necessary, in particular if the search was not designed by an information specialist. The primary search strategy must be checked for errors in spelling and use of Boolean operators (AND, OR, NOT). This means examining the entirety of the database search, and understanding how the search terms are connected to form a search strategy. The person reviewing the search strategy must have enough search experience to understand the syntax used and be familiar with systematic database searching (i.e., use of subject headings, free text search terms, and Boolean operators).

## 5 Reporting and record management

### 5.1 Search reporting

Any systematic search should be reported in as transparent and reproducible a manner as possible. This means that the search steps must be documented as the search is being developed and conducted. Appendix B provides some links to templates for search documentation.

At a minimum, search reporting includes a complete list of information sources and search techniques used, the search dates, and the complete search strategies of the database searches. Reporting should also state if the search strategies were peer-reviewed and how search results were deduplicated. PRISMA-S<sup>74</sup> provides a useful checklist and examples for search reporting. While not all items necessarily apply to a streamlined RR search, the overall guidance on reporting is still applicable to RRs.

### 5.2 Record management

Record management concerns the flow of citations throughout the whole review process, not just the search. This means keeping track of the number of records identified by each source (e.g., MEDLINE, citation-based searching), but also the deduplication process, the number screened at each stage, and the final number included or excluded.

As such the planning phase of the RR should also consider data management. For example, what type of data and documents will be collected, how they will be stored (e.g., file formats, folder structures, naming conventions, software and platforms used),<sup>75</sup> and what is required by the reporting standards (e.g., PRISMA<sup>76</sup>, PRISMA-S<sup>74</sup>).

Reference management software (e.g., EndNote, Zotero) should be used to manage large search results. This typically includes importing result sets from various databases and keeping track of the flow of citations (e.g., deduplication, screening). It is important to note that record management for database searches is less time consuming than for many types of supplementary or grey literature searches.<sup>77</sup> Bibliographic databases usually allow bulk export of search results to the reference management software and provide detailed search histories for documentation of search strategies. In contrast, supplementary search methods often require manual input of each individual source into the reference management software and manual documentation of search process. This means the time required to manage the search results from different sources is also a consideration for the overall RR time plan.

Additionally, software platforms for systematic review production (e.g., Covidence<sup>78</sup>, Eppi-Reviewer<sup>69</sup>) can provide a unified way to keep track of records throughout the whole review process, which can improve management and save time. However, the time and cost investment necessary to use these tools has to be considered.<sup>79</sup> These platforms are most likely useful for teams that regularly produce reviews.

### 5.3 Deduplication of search results

Because search results from various information sources are likely to overlap, special attention needs to be paid to the deduplication process.

Reference management software such as Endnote usually requires a stepwise deduplication process.<sup>80</sup> Some duplicates can be automatically identified and discarded by the software (e.g., records where the elements author, title, publication date, journal are identical). Other duplicates can be flagged by the software but need to be manually reviewed (e.g., a record where most elements are identical, but perhaps the formatting of the author lists varies giving the records an appearance of being different). Further fully manual deduplication may also be required. This stepwise deduplication process requires time and expertise but gives more control over the deduplication results.

On the other hand, some platforms (e.g., Covidence, SR-Accelerator<sup>81</sup>, Deduklick<sup>82</sup>) offer automated deduplication, but information about the deduplication methods (i.e., What data elements are compared?) and evaluations of their accuracy are only available in some cases.

When assessing what deduplication approaches are most efficient in a RR process, it is important to consider both time savings by deduplicating the results more quickly (e.g., through automation) and having a more accurate result of the deduplication process (i.e., missing as few duplicates as possible).

A high rate of false negatives (i.e., duplicate citations that should have been deleted but were not) will increase screening time. In contrast, false positives (i.e., citations that were incorrectly deleted as duplicates) may lower the sensitivity of the search result because relevant references could be lost. When considering the use of fully automated deduplication, time should be invested to assess the performance of the tool against the deduplication method commonly used by the team.

The review team also needs to decide what is considered a duplicate in the review context. The following are not considered true duplicates in the bibliographic sense but could be regarded as irrelevant for a RR:

- the preprint of an article where a later journal publication is available;
- different publications of the same conference abstract;
- re-prints of a research article;

- older versions of an SR where a recent update is available.

## References

1. European network for Health Technology Assessment (EUnetHTA). Process of information retrieval for systematic reviews and health technology assessments on clinical effectiveness. Version 2.0. 2020. [https://eunetha.eu/wp-content/uploads/2020/01/EUnetHTA\\_Guideline\\_Information\\_Retrieval\\_v2-0.pdf](https://eunetha.eu/wp-content/uploads/2020/01/EUnetHTA_Guideline_Information_Retrieval_v2-0.pdf).
2. Lefebvre C, Glanville J, Briscoe S, et al. Chapter 4: Searching for and selecting studies. In: Higgins JPT TJ, Chandler J, Cumpston M, Li T, Page MJ, Welch VA,, ed. *Cochrane Handbook for Systematic Reviews of Interventions*, version 60 (updated July 2019), 2019.
3. NICE. Developing NICE guidelines: the manual 2014 [updated 18 January 2022. Available from: <https://www.nice.org.uk/process/pmg20> accessed 31 March 2021.
4. Thielen FW, Van Mastrigt G, Burgers LT, et al. How to prepare a systematic review of economic evaluations for clinical practice guidelines: database selection and search strategy development (part 2/3). *Expert review of pharmacoeconomics & outcomes research* 2016;16(6):705-21. doi: 10.1080/14737167.2016.1246962
5. McGowan J, Sampson M. Systematic reviews need systematic searchers. *Journal of the Medical Library Association : JMLA* 2005;93(1):74-80.
6. Metzendorf M-I. Why medical information specialists should routinely form part of teams producing high quality systematic reviews—a Cochrane perspective. 2016
7. Rethlefsen ML, Farrell AM, Osterhaus Trzasko LC, et al. Librarian co-authors correlated with higher quality reported search strategies in general internal medicine systematic reviews. *J Clin Epidemiol* 2015;68(6):617-26. doi: 10.1016/j.jclinepi.2014.11.025
8. Spencer AJ, Eldredge JD. Roles for librarians in systematic reviews: a scoping review. *Journal of the Medical Library Association : JMLA* 2018;106(1):46-56. doi: 10.5195/jmla.2018.82 [published Online First: 2018/01/18]
9. Wafford QE, O'Dwyer LC. Adopting a toolkit to manage time, resources, and expectations in the systematic review process: a case report. *Journal of the Medical Library Association* 2021;109(4) doi: 10.5195/jmla.2021.1221
10. Gusenbauer M, Haddaway NR. What every researcher should know about searching – clarified concepts, search advice, and an agenda to improve finding in academia. *Research synthesis methods* 2020 136; 12(2). <https://doi.org/10.1002/jrsm.1457>.
11. Hirt J, Nordhausen T, Appenzeller-Herzog C, et al. Using citation tracking for systematic literature searching - study protocol for a scoping review of methodological studies and a Delphi study. *F1000Res* 2021;9:1386. doi: 10.12688/f1000research.27337.3
12. Sampson M, de Bruijn B, Urquhart C, et al. Complementary approaches to searching MEDLINE may be sufficient for updating systematic reviews. *J Clin Epidemiol* 2016;78:108-15. doi: 10.1016/j.jclinepi.2016.03.004 [published Online First: 2016/03/16]
13. Adam GP, Paynter R. Development of literature search strategies for evidence syntheses: pros and cons of incorporating text mining tools and objective approaches. *BMJ Evid Based Med* 2022 doi: 10.1136/bmjebm-2021-111892 [published Online First: 20220328]
14. Higgins JPT, Lasserson T, Chandler J, et al. Methodological Expectations of Cochrane Intervention Reviews (MECIR) [updated Version February 2022. Available from: <https://community.cochrane.org/mecir-manual> accessed 31 March 2022.
15. Nussbaumer-Streit B, Klerings I, Wagner G, et al. Abbreviated literature searches were viable alternatives to comprehensive searches: a meta-epidemiological study. *J Clin Epidemiol* 2018;102:1-11. doi: 10.1016/j.jclinepi.2018.05.022 [published Online First: 2018/06/05]
16. Bramer WM, Giustini D, Kramer BM. Comparing the coverage, recall, and precision of searches for 120 systematic reviews in Embase, MEDLINE, and Google Scholar: a prospective study. *Syst Rev* 2016;5:39. doi: 10.1186/s13643-016-0215-7

17. Frandsen TF, Eriksen MB, Hammer DMG, et al. PubMed coverage varied across specialties and over time: a large-scale study of included studies in Cochrane reviews. *J Clin Epidemiol* 2019;112:59-66. doi: 10.1016/j.jclinepi.2019.04.015 [published Online First: 2019/05/06]
18. Lorenzetti DL, Topfer LA, Dennett L, et al. Value of databases other than medline for rapid health technology assessments. *International journal of technology assessment in health care* 2014;30(2):173-8. doi: 10.1017/S0266462314000166 [published Online First: 2014/04/30]
19. Levay P, Raynor M, Tuvey D. The Contributions of MEDLINE, Other Bibliographic Databases and Various Search Techniques to NICE Public Health Guidance. *Evidence Based Library and Information Practice* 2015;10(1):50. doi: 10.18438/b82p55
20. Justesen T, Freyberg J, Schultz ANO. Database selection and data gathering methods in systematic reviews of qualitative research regarding diabetes mellitus - an explorative study. *BMC medical research methodology* 2021;21(1):94. doi: 10.1186/s12874-021-01281-2 [published Online First: 2021/05/05]
21. Wright JM, Cottrell DJ, Mir G. Searching for religion and mental health studies required health, social science, and grey literature databases. *J Clin Epidemiol* 2014;67(7):800-10. doi: 10.1016/j.jclinepi.2014.02.017
22. Burtis AT, Howell SM, Taylor MK. Mapping the literature of health care management: an update. *Journal of the Medical Library Association : JMLA* 2021;109(3):464-71. doi: 10.5195/jmla.2021.1121
23. Levay P, Heath A, Tuvey D. Efficient searching for NICE public health guidelines: Would using fewer sources still find the evidence? *Research synthesis methods* 2022 doi: 10.1002/jrsm.1577 [published Online First: 20220603]
24. Hartling L, Featherstone R, Nuspl M, et al. The contribution of databases to the results of systematic reviews: a cross-sectional study. *BMC medical research methodology* 2016;16(1):127. doi: 10.1186/s12874-016-0232-1 [published Online First: 2016/09/28]
25. Marshall IJ, Marshall R, Wallace BC, et al. Rapid reviews may produce different results to systematic reviews: a meta-epidemiological study. *J Clin Epidemiol* 2019;109:30-41. doi: 10.1016/j.jclinepi.2018.12.015 [published Online First: 2018/12/28]
26. Glanville J, Kotas E, Featherstone R, et al. Which are the most sensitive search filters to identify randomized controlled trials in MEDLINE? *Journal of the Medical Library Association : JMLA* 2020;108(4):556-63. doi: 10.5195/jmla.2020.912 [published Online First: 2020/10/06]
27. The InterTASC Information Specialists' Sub-Group. ISSG Search Filter Resource [Available from: <https://sites.google.com/a/york.ac.uk/issg-search-filters-resource/home> accessed 28 Feb 2022.
28. Wiley. Cochrane Central Register of Controlled Trials (CENTRAL) [Available from: <https://www.cochranelibrary.com/central/about-central> accessed 28 Feb 2022.
29. Noel-Storr AH, Dooley G, Wisniewski S, et al. Cochrane Centralised Search Service showed high sensitivity identifying randomized controlled trials: A retrospective analysis. *J Clin Epidemiol* 2020;127:142-50. doi: 10.1016/j.jclinepi.2020.08.008 [published Online First: 20200813]
30. Schmucker C, Schell LK, Portalupi S, et al. Extent of non-publication in cohorts of studies approved by research ethics committees or included in trial registries. *PLoS One* 2014;9(12):e114023. doi: 10.1371/journal.pone.0114023
31. Hartling L, Featherstone R, Nuspl M, et al. Grey literature in systematic reviews: a cross-sectional study of the contribution of non-English reports, unpublished studies and dissertations to the results of meta-analyses in child-relevant reviews. *BMC medical research methodology* 2017;17(1):64. doi: 10.1186/s12874-017-0347-z
32. McAuley L, Pham B, Tugwell P, et al. Does the inclusion of grey literature influence estimates of intervention effectiveness reported in meta-analyses? *The Lancet* 2000;356(9237):1228-31. doi: 10.1016/S0140-6736(00)02786-0
33. Schmucker CM, Blumle A, Schell LK, et al. Systematic review finds that study data not published in full text articles have unclear impact on meta-analyses results in medical research. *PLoS One* 2017;12(4):e0176210. doi: 10.1371/journal.pone.0176210 [published Online First: 20170425]

34. Knelangen M, Hausner E, Metzendorf MI, et al. Trial registry searches for randomized controlled trials of new drugs required registry-specific adaptation to achieve adequate sensitivity. *J Clin Epidemiol* 2018;94:69-75. doi: 10.1016/j.jclinepi.2017.11.003 [published Online First: 20171111]
35. Sender D, Clark J, Hoffmann TC. Analysis of articles directly related to randomized trials finds poor protocol availability and inconsistent linking of articles. *J Clin Epidemiol* 2020;124:69-74. doi: 10.1016/j.jclinepi.2020.04.017 [published Online First: 20200428]
36. ClinicalTrials.gov. How to Find Results of Studies [Available from: <https://www.clinicaltrials.gov/ct2/help/how-find/find-study-results> accessed 28 Feb 2022.
37. Baudard M, Yavchitz A, Ravaud P, et al. Impact of searching clinical trial registries in systematic reviews of pharmaceutical treatments: methodological systematic review and reanalysis of meta-analyses. *Bmj* 2017;356:j448. doi: 10.1136/bmj.j448
38. Rice M, Ali MU, Fitzpatrick-Lewis D, et al. Testing the effectiveness of simplified search strategies for updating systematic reviews. *J Clin Epidemiol* 2017;88:148-53. doi: 10.1016/j.jclinepi.2017.06.005 [published Online First: 2017/06/20]
39. Affengruber L, Wagner G, Waffenschmidt S, et al. Combining abbreviated literature searches with single-reviewer screening: three case studies of rapid reviews. *Syst Rev* 2020;9(1):162. doi: 10.1186/s13643-020-01413-7 [published Online First: 2020/07/20]
40. Levay P, Finnegan A. The NICE COVID-19 search strategy for Ovid MEDLINE and Embase: developing and maintaining a strategy to support rapid guidelines. *medRxiv* 2021:2021.06.11.21258749. doi: 10.1101/2021.06.11.21258749
41. Fidahic M, Nujic D, Runjic R, et al. Research methodology and characteristics of journal articles with original data, preprint articles and registered clinical trial protocols about COVID-19. *BMC medical research methodology* 2020;20(1):161. doi: 10.1186/s12874-020-01047-2 [published Online First: 20200622]
42. Gianola S, Jesus TS, Barger S, et al. Characteristics of academic publications, preprints, and registered clinical trials on the COVID-19 pandemic. *PLoS One* 2020;15(10):e0240123. doi: 10.1371/journal.pone.0240123 [published Online First: 2020/10/07]
43. Oikonomidi T, Boutron I, Pierre O, et al. Changes in evidence for studies assessing interventions for COVID-19 reported in preprints: meta-research study. *BMC Med* 2020;18(1):402. doi: 10.1186/s12916-020-01880-8 [published Online First: 20201217]
44. Rosenberger KJ, Xu C, Lin L. Methodological assessment of systematic reviews and meta-analyses on COVID-19: A meta-epidemiological study. *J Eval Clin Pract* 2021;27(5):1123-33. doi: 10.1111/jep.13578 [published Online First: 20210505]
45. Iannizzi C, Dorando E, Burns J, et al. Methodological challenges for living systematic reviews conducted during the COVID-19 pandemic: A concept paper. *J Clin Epidemiol* 2021;141:82-89. doi: 10.1016/j.jclinepi.2021.09.013 [published Online First: 20210912]
46. COVID-NMA [Available from: <https://covid-nma.com> accessed 31 March 2022.
47. Department of Clinical Research at University of Basel, Meta-Research Innovation Center. COVID-evidence Database [updated 2021. Available from: <https://covid-evidence.org/> accessed 4 March 2022.
48. Metzendorf MI, Featherstone RM. Evaluation of the comprehensiveness, accuracy and currency of the Cochrane COVID-19 Study Register for supporting rapid evidence synthesis production. *Research synthesis methods* 2021;12(5):607-17. doi: 10.1002/jrsm.1501 [published Online First: 20210801]
49. Pierre O, Riveros C, Charpy S, et al. Secondary electronic sources demonstrated very good sensitivity for identifying studies evaluating interventions for COVID-19. *J Clin Epidemiol* 2021;141:46-53. doi: 10.1016/j.jclinepi.2021.09.022 [published Online First: 20210920]
50. Verdugo-Paiva F, Vergara C, Ávila C, et al. COVID-19 L-OVE REPOSITORY IS HIGHLY COMPREHENSIVE AND CAN BE USED AS A SINGLE SOURCE FOR COVID-19 STUDIES. *medRxiv* 2021 doi: 10.1101/2021.09.21.21263849



51. Canadian Agency for Drugs and Technologies in Health. CADTH COVID-19 Search Strings [updated 2 September 2021. Available from: <https://covid.cadth.ca/literature-searching-tools/cadth-covid-19-search-strings/> accessed 4 March 2022.
52. Ket JCF, Otten RHJ, Van Dusseldorp I. Search blocks/Zoekblokken: Coronavirus 2019 (COVID-19) (COVID-19 SARS MERS) [updated 18 November 2021. Available from: <https://blocks.bmi-online.nl/catalog/397> accessed 4 March 2022.
53. ClinicalTrials.gov. COVID-19 [Available from: <https://clinicaltrials.gov/ct2/results?cond=COVID-19> accessed 4 March 2022.
54. PubMed.gov. PubMed Clinical Queries [Available from: <https://pubmed.ncbi.nlm.nih.gov/clinical/> accessed 4 March 2022.
55. Wolters Kluwer Health. MEDLINE® 2022 Database Guide [updated February 28, 2022. Available from: <https://ospguides.ovid.com/OSPguides/medline.htm> accessed 4 March 2022.
56. Elsevier. Scopus Content Coverage Guide 2020 [Available from: [https://www.elsevier.com/\\_data/assets/pdf\\_file/0007/69451/Scopus\\_ContentCoverage\\_Guide\\_WEB.pdf](https://www.elsevier.com/_data/assets/pdf_file/0007/69451/Scopus_ContentCoverage_Guide_WEB.pdf) accessed 31 March 2022.
57. National Library of Medicine. MEDLINE, PubMed, and PMC (PubMed Central): How are they different? [updated October 13, 2021. Available from: <https://www.nlm.nih.gov/bsd/difference.html> accessed 31 March 2022.
58. Ebsco. CINAHL Complete Database Coverage List [Available from: <https://www.ebsco.com/m/ee/Marketing/titleLists/ccm-coverage.htm> accessed 31 March 2022.
59. Hausner E, Guddat C, Hermanns T, et al. Development of search strategies for systematic reviews: validation showed the noninferiority of the objective approach. *J Clin Epidemiol* 2015;68(2):191-9. doi: 10.1016/j.jclinepi.2014.09.016
60. Hausner E, Waffenschmidt S, Kaiser T, et al. Routine development of objectively derived search strategies. *Syst Rev* 2012;1:19. doi: 10.1186/2046-4053-1-19 [published Online First: 20120229]
61. Grames EM, Stillman AN, Tingley MW, et al. An automated approach to identifying search terms for systematic reviews using keyword co-occurrence networks. *Methods in Ecology and Evolution* 2019;10(10):1645-54. doi: 10.1111/2041-210x.13268
62. Scells H, Zuccon G, Koopman B. A comparison of automatic Boolean query formulation for systematic reviews. *Information Retrieval Journal* 2021;24(1):3-28. doi: 10.1007/s10791-020-09381-1
63. Clark J, Glasziou P, Del Mar C, et al. A full systematic review was completed in 2 weeks using automation tools: a case study. *J Clin Epidemiol* 2020;121:81-90. doi: 10.1016/j.jclinepi.2020.01.008 [published Online First: 2020/02/01]
64. Paynter RA, Featherstone R, Stoeger E, et al. A prospective comparison of evidence synthesis search strategies developed with and without text-mining tools. *J Clin Epidemiol* 2021 doi: 10.1016/j.jclinepi.2021.03.013 [published Online First: 2021/03/24]
65. Bramer WM, de Jonge GB, Rethlefsen ML, et al. A systematic approach to searching: an efficient and complete method to develop literature searches. *Journal of the Medical Library Association : JMLA* 2018;106(4):531-41. doi: 10.5195/jmla.2018.283 [published Online First: 20181001]
66. Clark JM, Sanders S, Carter M, et al. Improving the translation of search strategies using the Polyglot Search Translator: a randomized controlled trial. *Journal of the Medical Library Association : JMLA* 2020;108(2):195-207. doi: 10.5195/jmla.2020.834 [published Online First: 2020/04/08]
67. Lefebvre C, Glanville J, Briscoe S, et al. Technical Supplement to Chapter 4: Searching for and selecting studies. In: Higgins JPT, Thomas J, Chandler J, et al., eds. *Cochrane Handbook for Systematic Reviews of Interventions* Version 63 (updated February 2022), 2022.
68. Thomas J, McDonald S, Noel-Storr A, et al. Machine learning reduced workload with minimal risk of missing studies: development and evaluation of a randomized controlled trial classifier for

- Cochrane Reviews. *J Clin Epidemiol* 2021;133:140-51. doi: 10.1016/j.jclinepi.2020.11.003 [published Online First: 20201107]
69. Thomas J, Graziosi S, Brunton J, et al. EPPI-Reviewer: advanced software for systematic reviews, maps and evidence synthesis. *EPPI-Centre Software London: UCL Social Research Institute* 2022
70. EPPI-Centre. Automation tools in EPPI-Reviewer 2021 [Available from: <https://eppi.ioe.ac.uk/cms/Default.aspx?tabid=3772> accessed 4 July 2022.
71. Health Information Research Unit. Search Filters for MEDLINE in Ovid Syntax and the PubMed translation [updated February 9, 2016. Available from: [https://hiru.mcmaster.ca/hiru/HIRU\\_Hedges\\_MEDLINE\\_Strategies.aspx](https://hiru.mcmaster.ca/hiru/HIRU_Hedges_MEDLINE_Strategies.aspx) accessed 6 March 2022.
72. Waffenschmidt S, Navarro-Ruan T, Hobson N, et al. Development and validation of study filters for identifying controlled non-randomized studies in PubMed and Ovid MEDLINE. *Research synthesis methods* 2020 doi: 10.1002/jrsm.1425
73. McGowan J, Sampson M, Salzwedel DM, et al. PRESS Peer Review of Electronic Search Strategies: 2015 Guideline Statement. *J Clin Epidemiol* 2016;75:40-6. doi: 10.1016/j.jclinepi.2016.01.021 [published Online First: 20160319]
74. Rethlefsen ML, Kirtley S, Waffenschmidt S, et al. PRISMA-S: an extension to the PRISMA Statement for Reporting Literature Searches in Systematic Reviews. *Syst Rev* 2021;10(1):39. doi: 10.1186/s13643-020-01542-z
75. Premji Z, Ganshorn H, University of Calgary. Guide to the Portage DMP Assistant Template for Systematic Review Projects 2021 [Available from: <https://library.ucalgary.ca/DMPforSR>.
76. Page MJ, McKenzie JE, Bossuyt PM, et al. The PRISMA 2020 statement: an updated guideline for reporting systematic reviews. *Bmj* 2021;372:n71. doi: 10.1136/bmj.n71 [published Online First: 20210329]
77. Nussbaumer-Streit B, Ellen M, Klerings I, et al. Resource use during systematic review production varies widely: a scoping review. *J Clin Epidemiol* 2021 doi: 10.1016/j.jclinepi.2021.05.019 [published Online First: 2021/06/07]
78. Veritas Health Innovation Ltd. Covidence [Available from: <https://www.covidence.org/> accessed 11 March 2022.
79. Scott AM, Forbes C, Clark J, et al. Systematic review automation tools improve efficiency but lack of knowledge impedes their adoption: a survey. *J Clin Epidemiol* 2021;138:80-94. doi: 10.1016/j.jclinepi.2021.06.030 [published Online First: 2021/07/10]
80. Hair K, Bahor Z, Macleod M, et al. The Automated Systematic Search Deduplicator (ASySD): a rapid, open-source, interoperable tool to remove duplicate citations in biomedical systematic reviews. *bioRxiv* 2021:2021.05.04.442412. doi: 10.1101/2021.05.04.442412
81. Institute for Evidence-Based Healthcare. IEBH Systematic Review Accelerator [Available from: <https://sr-accelerator.com/#/> accessed 11 March 2022.
82. Borissov N, Haas Q, Minder B, et al. Reducing systematic review burden using Deduklick: a novel, automated, reliable, and explainable deduplication algorithm to foster medical research. *Syst Rev* 2022;11(1):172. doi: 10.1186/s13643-022-02045-9 [published Online First: 20220817]
